# Supplementary material for: Isotopic studies of the ammonia decomposition reaction using lithium imide catalyst
Source: Royal Society of Chemistry journal article supplement (doi:10.1039/c6cp07734j), 2017-01-01
Supplement: c6cp07734j1.pdf [file c6cp07734j1.pdf]

## Isotopic Studies of the Ammonia Decomposition Reaction Using Lithium Imide Catalyst: Supplementary Information

### DATA FITTING PROCEDURES

#### Mass Spectrometry Data Analysis

Calibration runs of 100% pure Ar, N<sub>2</sub>, NH<sub>3</sub> and H<sub>2</sub> were performed in order to ascertain the fragment peak ratios, Table S1. The <sup>14</sup>N<sub>2</sub>, <sup>15</sup>N<sub>2</sub> and <sup>14</sup>N<sup>15</sup>N species fragmentation patterns were assumed to follow the same probabilities as that of N<sub>2</sub> with natural isotopic abundance. The mass spectrometer collected histograms from m/z = 2 to m/z = 40 (integer steps), which were fitted to linear combinations of the fragmentation patterns in Table S1. A Levenberg-Marquardt least-squares algorithm was used to minimise the error for the fits.<sup>1</sup>

Table S1: Mass Spectrometry Fragmentation Patterns for Pure Gases

| Gas (pure)      | m/z | Fraction | Associated Fragment                          |
|-----------------|-----|----------|----------------------------------------------|
| Ar              | 40  | 0.8627   | <sup>40</sup> Ar <sup>+</sup>                |
|                 | 36  | 0.0030   | <sup>36</sup> Ar <sup>+</sup>                |
|                 | 20  | 0.1343   | <sup>40</sup> Ar <sup>++</sup>               |
| N <sub>2</sub>  | 29  | 0.0069   | <sup>14</sup> N <sup>15</sup> N <sup>+</sup> |
|                 | 28  | 0.9401   | <sup>14</sup> N <sub>2</sub> <sup>+</sup>    |
|                 | 14  | 0.0530   | <sup>14</sup> N <sup>+</sup>                 |
| NH <sub>3</sub> | 28  | 0.0149   | <sup>14</sup> N <sub>2</sub> <sup>+</sup>    |
|                 | 18  | 0.0162   | <sup>14</sup> NH <sub>4</sub> <sup>+</sup>   |
|                 | 17  | 0.5209   | <sup>14</sup> NH <sub>3</sub> <sup>+</sup>   |
|                 | 16  | 0.4018   | <sup>14</sup> NH <sub>2</sub> <sup>+</sup>   |
|                 | 15  | 0.0218   | <sup>14</sup> NH <sup>+</sup>                |
|                 | 14  | 0.0078   | <sup>14</sup> N <sup>+</sup>                 |
|                 | 2   | 0.0166   | H <sub>2</sub> <sup>+</sup>                  |
| H <sub>2</sub>  | 3   | 0.0111   | H <sub>3</sub> <sup>+</sup>                  |
|                 | 2   | 0.9889   | H <sub>2</sub> <sup>+</sup>                  |

#### Scrambling of N<sub>2</sub> species

The difference between the measured <sup>14</sup>N<sub>2</sub>, <sup>14</sup>N<sup>15</sup>N and <sup>15</sup>N<sub>2</sub> species and their calculated scrambled counterparts are shown to be related as follows. Let the fraction of measured <sup>14</sup>N<sub>2</sub> be *a*, the measured fraction of <sup>14</sup>N<sup>15</sup>N be *b* and the total N<sub>2</sub> fraction be *s* (thus, measured <sup>15</sup>N<sub>2</sub> is *t* - *a* - *b*). Then:

$$\begin{aligned} {}^{14}\text{N}_2(\text{measured}) - {}^{14}\text{N}_2(\text{calculated}) &= a - \left(\frac{a+\frac{1}{2}b}{s}\right)^2 s \\ &= a - \frac{(a+\frac{1}{2}b)^2}{s} \end{aligned}$$

And:

$$\begin{aligned} {}^{15}\text{N}_2(\text{measured}) - {}^{15}\text{N}_2(\text{calculated}) &= s - a - b - \left(1 - \frac{a+\frac{1}{2}b}{s}\right)^2 s \\ &= s - a - b - \left(s - 2\left(a + \frac{1}{2}b\right) + \frac{(a+\frac{1}{2}b)^2}{s}\right) \end{aligned}$$

$$= a - \frac{(a + \frac{1}{2}b)^2}{s}$$

Which is the same as the  $\Delta^{14}\text{N}_2$  expression.

Similarly for  $^{14}\text{N}^{15}\text{N}$ :

$$\begin{aligned} ^{14}\text{N}^{15}\text{N}(\text{measured}) - ^{14}\text{N}^{15}\text{N}(\text{calculated}) &= b - 2 \frac{a + \frac{1}{2}b}{s} \left( 1 - \frac{a + \frac{1}{2}b}{s} \right) s \\ &= b - 2 \left( a + \frac{1}{2}b - \frac{(a + \frac{1}{2}b)^2}{s} \right) \\ &= -2 \left( a - \frac{(a + \frac{1}{2}b)^2}{s} \right) \end{aligned}$$

Which is minus double the  $\Delta^{14}\text{N}_2$  expression.

### Sigmoid fitting

Sigmoid fitting used a Levenberg-Marquardt algorithm to fit to the following function:

$$1 - f_{\text{NH}_3} = 1 - \exp\left(-\exp\left(\frac{A}{R} - \frac{E_A}{RT}\right)\right)$$

where  $A$  and  $E_A$  are fitted parameters,  $R$  is the gas constant and  $T$  is the temperature. For the lithium amide only and lithium amide plus iron cases, a more complex function was used, viz:

$$1 - f_{\text{NH}_3} = xC_1 + (1 - x)C_2$$

where  $C_i$  denoted single Gompertz sigmoid functions (as above) and  $x$  was a value between 0 and 1.

### References

- (1) T. J. Wood, J. W. Makepeace, H. M. A. Hunter, M. O. Jones and W. I. F. David, *Phys. Chem. Chem. Phys.*, 2015, **17**, 22999–23006.
